# Supplementary material for: Interpenetrating Hydrogel Networks Enhance Mechanical Stability, Rheological Properties, Release Behavior and Adhesiveness of Platelet-Rich Plasma
Source: MDPI journal article supplement (doi:10.3390/ijms21041399), 2020-02-19
Supplement: s1 [file s1]

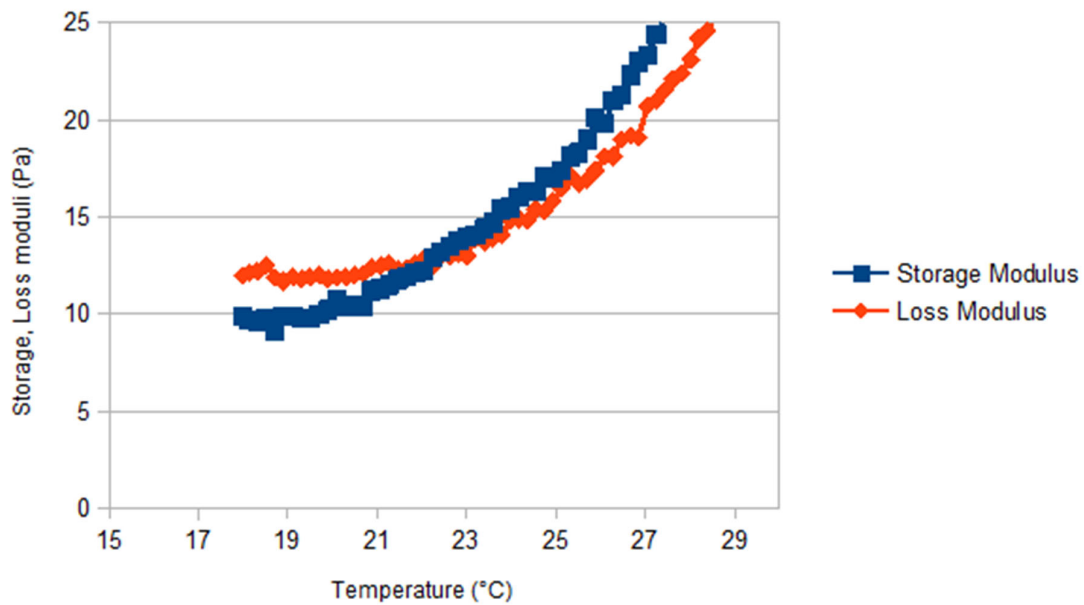

Figure S1. Representative storage and loss moduli values as a function of temperature for 20% placebo hydrogels. The figure shows that at the temperature of 22.4 °C the value of storage
